# Supplementary material
Source: publisher figshare collection journal article supplement (https://gsajournals.figshare.com/articles/dataset/_/16689217)
Supplement: Supplementary file 1 [file 1]

Conventional IJs emerged from insects

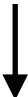

**Ancestral mating groups**  
(10 lines PS9159- 9168):

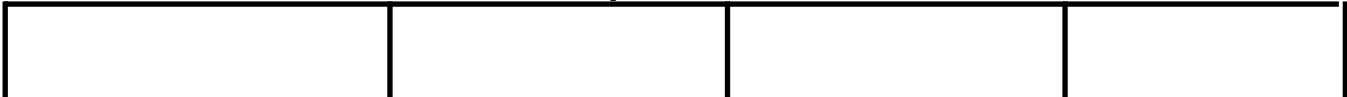

III

IV

VI

VII

IX

Ancestral lines

PS9161

PS9162

PS9164

PS9165

PS9167

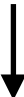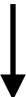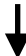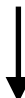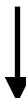

5x Inbred lines

Line 2

PS9169

Line 42

PS9173

Line 19

PS9174

Line 20

PS9170

Line 24

PS9171

Line 35

PS9172

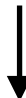

10x Inbred lines

PS9179

Wild-type strain for genetics study
